# Supplementary material for: Size-dependent tuning of horseradish peroxidase bioreactivity by gold nanoparticles
Source: Royal Society of Chemistry journal article supplement (doi:10.1039/c4nr07056a), 2015-01-01
Supplement: c4nr07056a1.pdf [file c4nr07056a1.pdf]

1 **Supplementary Data**

2 **Size-Dependent Tuning of Horseradish Peroxidase**

3 **Bioreactivity by Gold Nanoparticles**

4 Haohao Wu<sup>a, b, c</sup>, Yi Liu<sup>b</sup>, Meng Li<sup>b</sup>, Yu Chong<sup>b</sup>, Mingyong Zeng<sup>a</sup>, Y. Martin Lo<sup>c</sup>, Jun-Jie Yin<sup>b, \*</sup>

5 <sup>a</sup>College of Food Science and Engineering, Ocean University of China, 5 Yushan Road,  
6 Qingdao, Shandong Province 266003, China

7 <sup>b</sup>Division of Analytical Chemistry, Office of Regulatory Science, Center for Food Safety and  
8 Applied Nutrition, U.S. Food and Drug Administration, College Park, MD 20740, USA.

9 <sup>c</sup>Department of Nutrition and Food Science, University of Maryland, College Park, MD 20742,  
10 USA

11

12 \*Corresponding Author.

13 Jun-Jie Yin

14 Tel: 240-402-1991. Fax: 201-436-2624. Email: junjie.yin@fda.hhs.gov

15

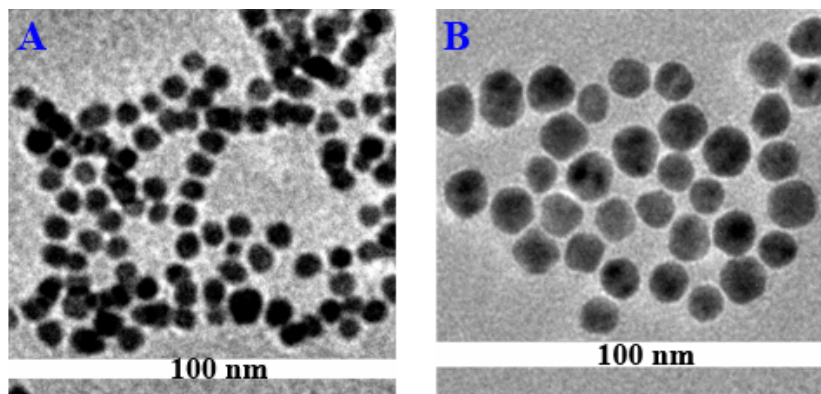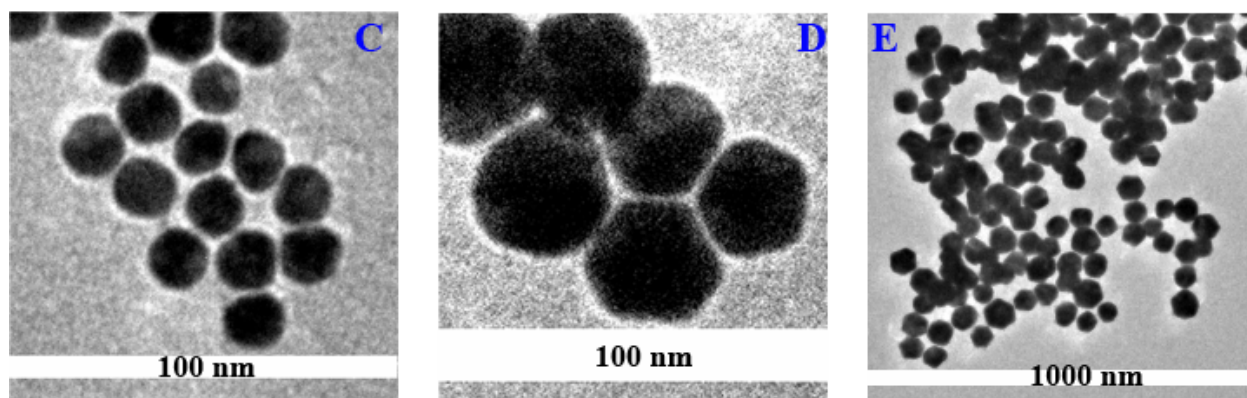

16

17 **Fig. S1** TEM images of (A) Au-5nm, (B) Au-10nm, (C) Au-15nm, (D) Au-30nm, and (E) Au-60nm.

18

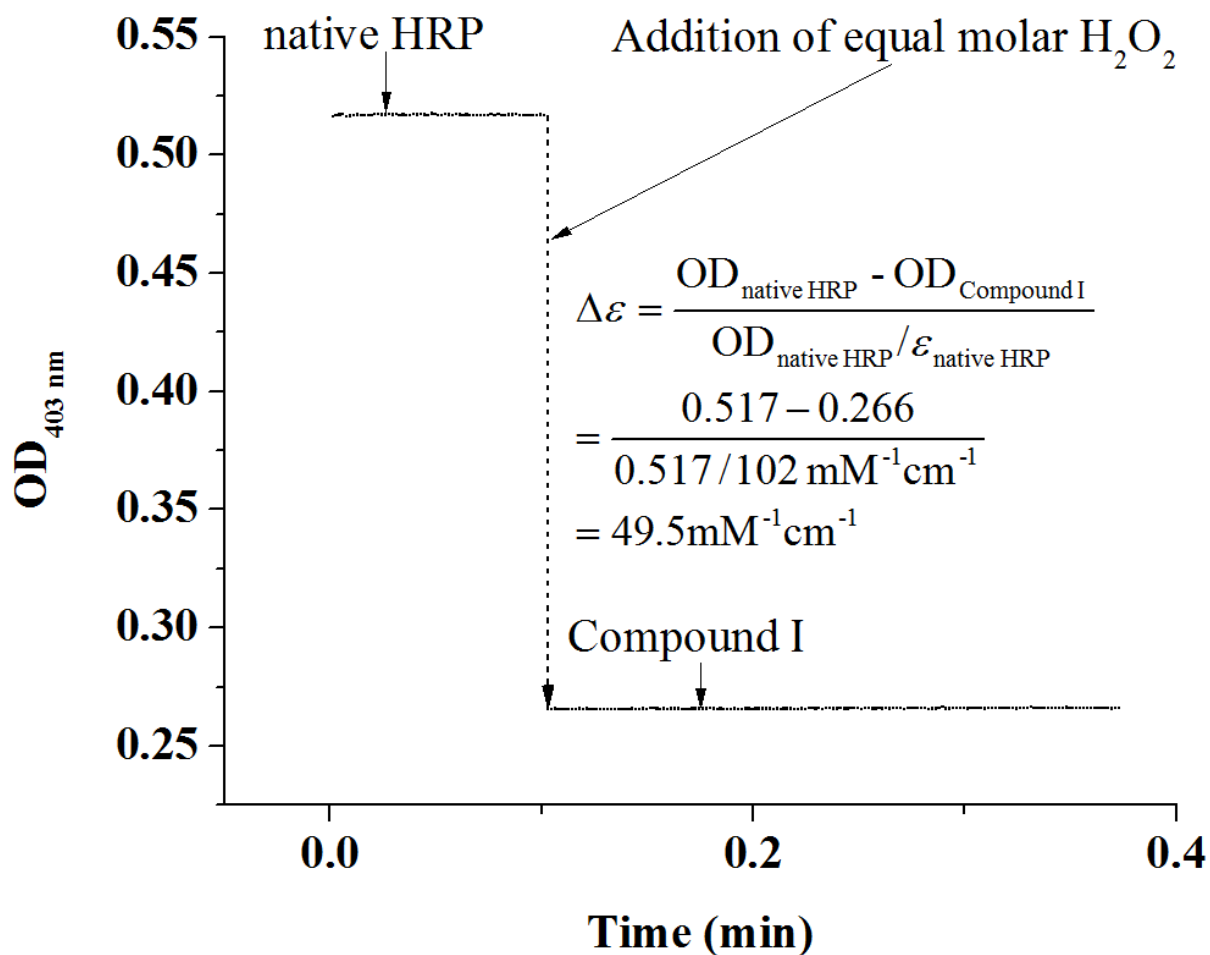

19

20 **Fig. S2.** Calculation of  $\Delta\varepsilon$  (the difference extinction coefficient at 403 nm of native HRP minus Compound I) based on  
 21 the time-dependent changes in absorption of 5  $\mu\text{M}$  HRP in 10 mM PBS (pH 7.2) at 403 nm before and after the  
 22 addition of equal molar  $\text{H}_2\text{O}_2$ .

23

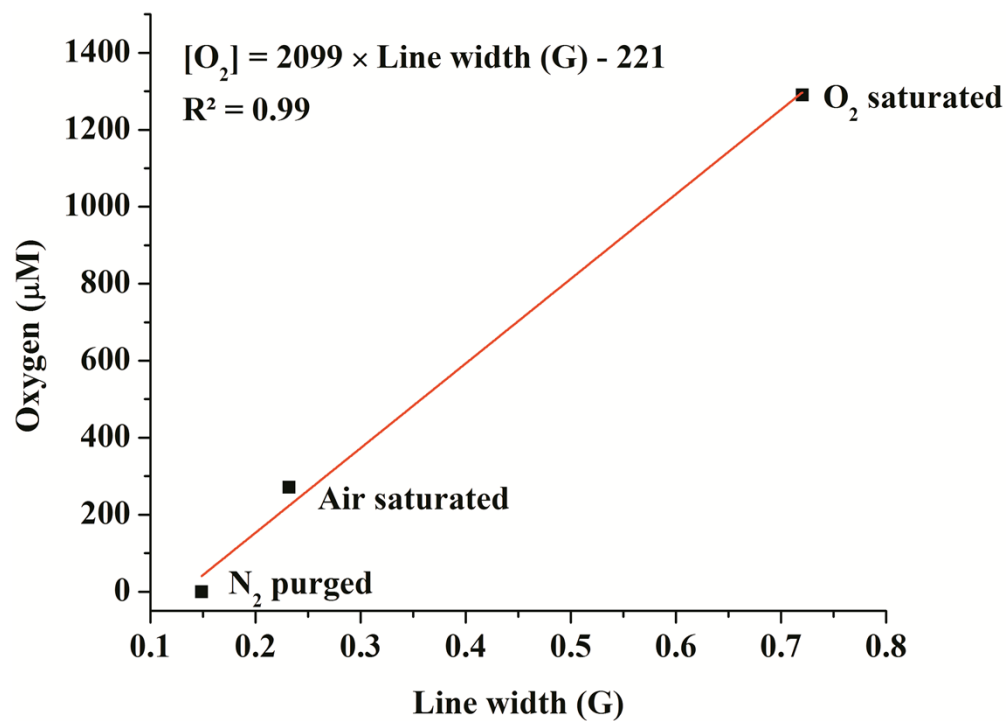

24

25 **Fig. S3.** The linear relationship between line width of ESR spectra and O<sub>2</sub> concentration in solutions. In the O<sub>2</sub>  
26 saturated solution, the O<sub>2</sub> concentration is 1229 µM. While in the air saturated solution, the O<sub>2</sub> concentration is 258  
27 µM.

28

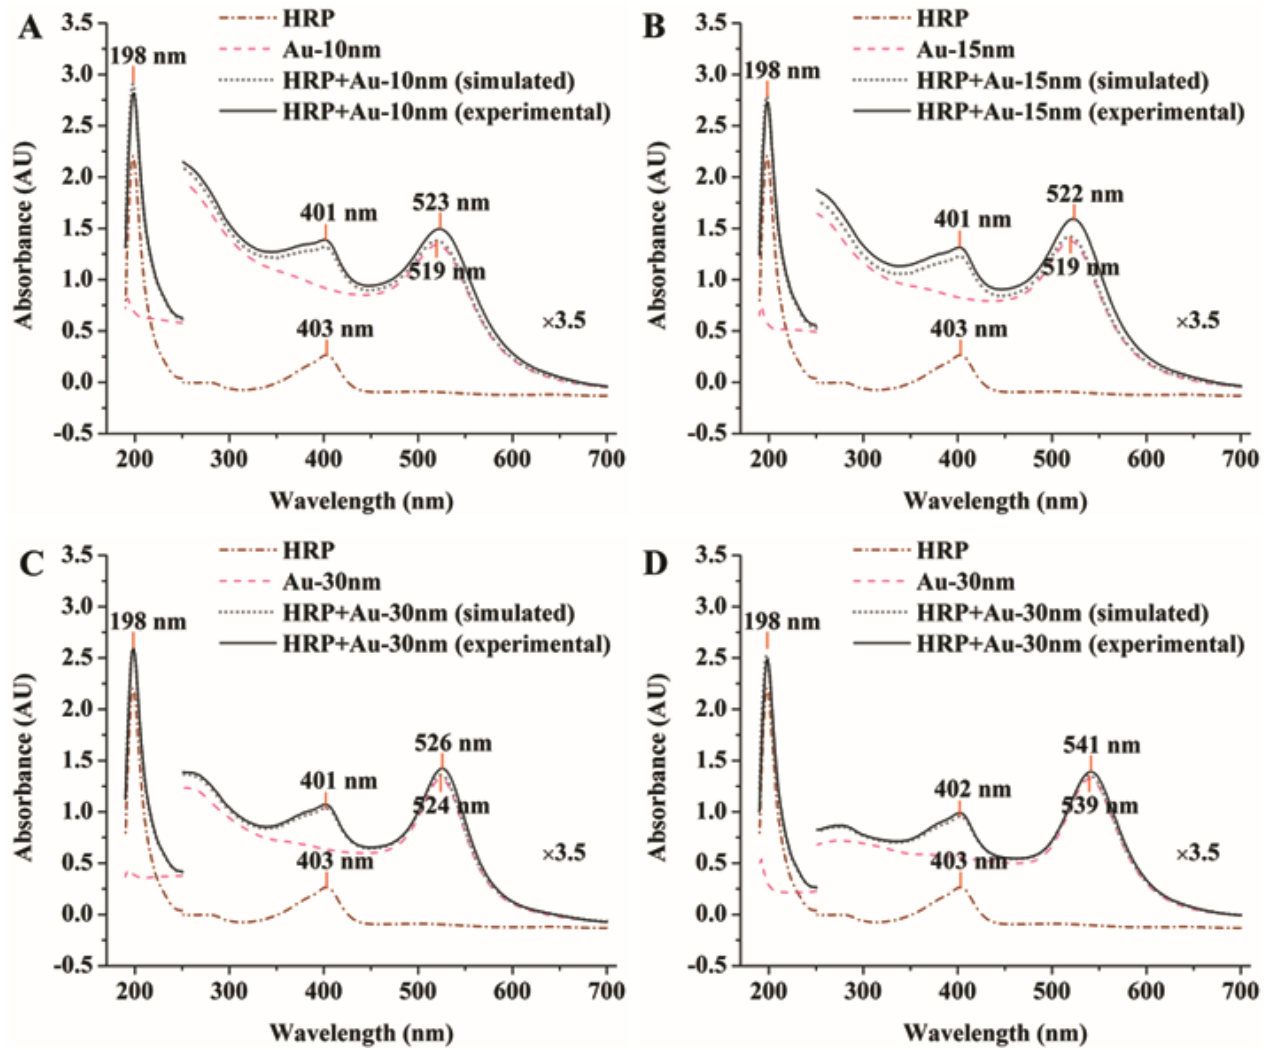

29

30 **Fig. S4.** The UV-Vis spectra of HRP (1.1  $\mu\text{M}$ ), AuNPs (A, Au-10nm; B, Au-15nm; C, Au-30nm; D, Au-60nm) (OD =  
 31 0.4), and their mixture in 10 mM PBS (pH 7.2). The simulated spectrum was the result of adding of the spectra of  
 32 HRP and Au-5nm. The background spectrum of the buffer has been subtracted.

33

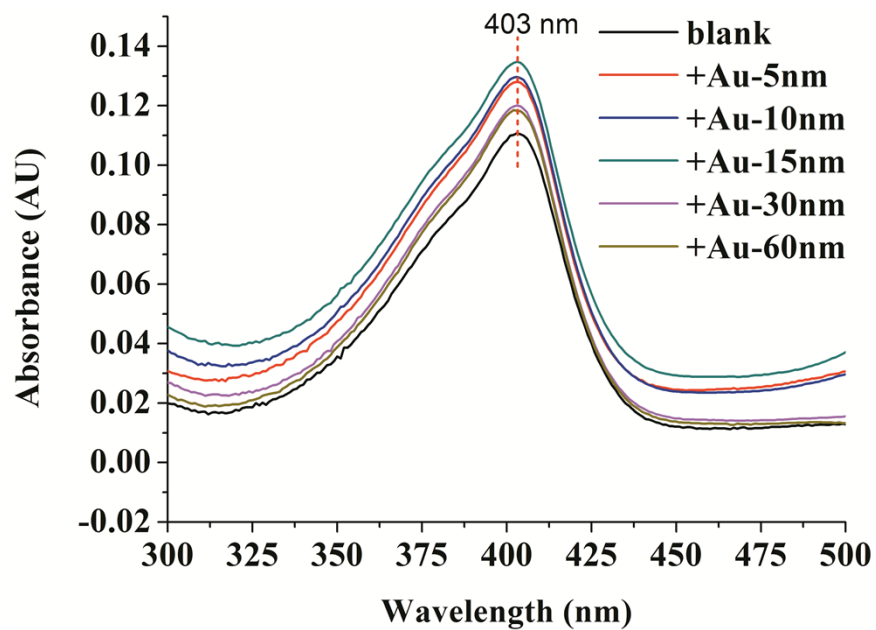

34

35 **Fig. S5.** The UV-Vis spectra of HRP (1.1  $\mu\text{M}$ ) with or without the presence of AuNPs (Au-5nm, Au-10nm, Au-15nm,  
36 Au-30nm, and Au-60nm) (OD = 0.4) in 10 mM PBS (pH 7.2). The spectra in the presence of AuNPs were the results  
37 of the subtraction of the spectra of AuNPs from those of the mixture of AuNPs and HRP. The background spectrum of  
38 the buffer has been subtracted.

39
